# Supplementary material for: Chromatin remodeller CHD7 is required for GABAergic neuron development by promoting PAQR3 expression
Source: PubMed Central journal article supplement — EMBO Rep. 2021 Apr 26;22(6):e50958. doi: 10.15252/embr.202050958 (PMC8183419; doi:10.15252/embr.202050958), 2021-04-26
Supplement: EMBR-22-e50958-s005.pdf [file EMBR-22-e50958-s005.pdf]

## Expanded View Figures

### Figure EV1. Generation and characterization of *chd7* mutants.

- A Translation following genome editing resulted in a premature stop codon (\*) in *chd7*<sup>-/-</sup> fish.
- B qPCR analysis of RNAs from 3dpf larvae shows a significant reduction of *chd7* mRNA expression in both *chd7*<sup>+/-</sup> and *chd7*<sup>-/-</sup> compared with wild-type ( $N = 5$ ). \*\*\*\* $P < 0.0001$ , one-way ANOVA.
- C Examination of brain tissues in *chd7*<sup>+/+</sup> (left images) and *chd7*<sup>-/-</sup> (right images) by H&E staining at 5 dpf. Zebrafish brains were sectioned at telencephalic (1,1'), diencephalic (2, 2'), mesencephalic (3,3') and rhombencephalic levels (4,4'). Levels of sections are indicated in the sketch of a sagittal view of a 5 dpf zebrafish brain (top image). The scale bar is 0.12 mm. P: pallium, S: subpallium, Po: preoptic region, Tel: Telencephalon; TeO: tectum opticum (or OT: optic tectum), m: medial tectal proliferating zone, DT: dorsal thalamus, PTd: dorsal part of posterior tuberculum, PTv: ventral part of posterior tuberculum, MO: medulla oblongata, Hyp: hypothalamus, CeP: cerebellar plate.
- D *chd7*<sup>-/-</sup> mutant fish displayed features of CS such as heart defects (red arrow) at a low penetrance ( $N = 3$ ). \*\*\*\* $P < 0.0001$ ; Student's *t*-test.
- E Alcian blue staining of 6dpf larvae showing craniofacial defects at Meckel's cartilage (red arrow).

Data information: Data are presented as mean  $\pm$  SEM. *n* is the number of fish used. *N* is the number of experimental repeats.

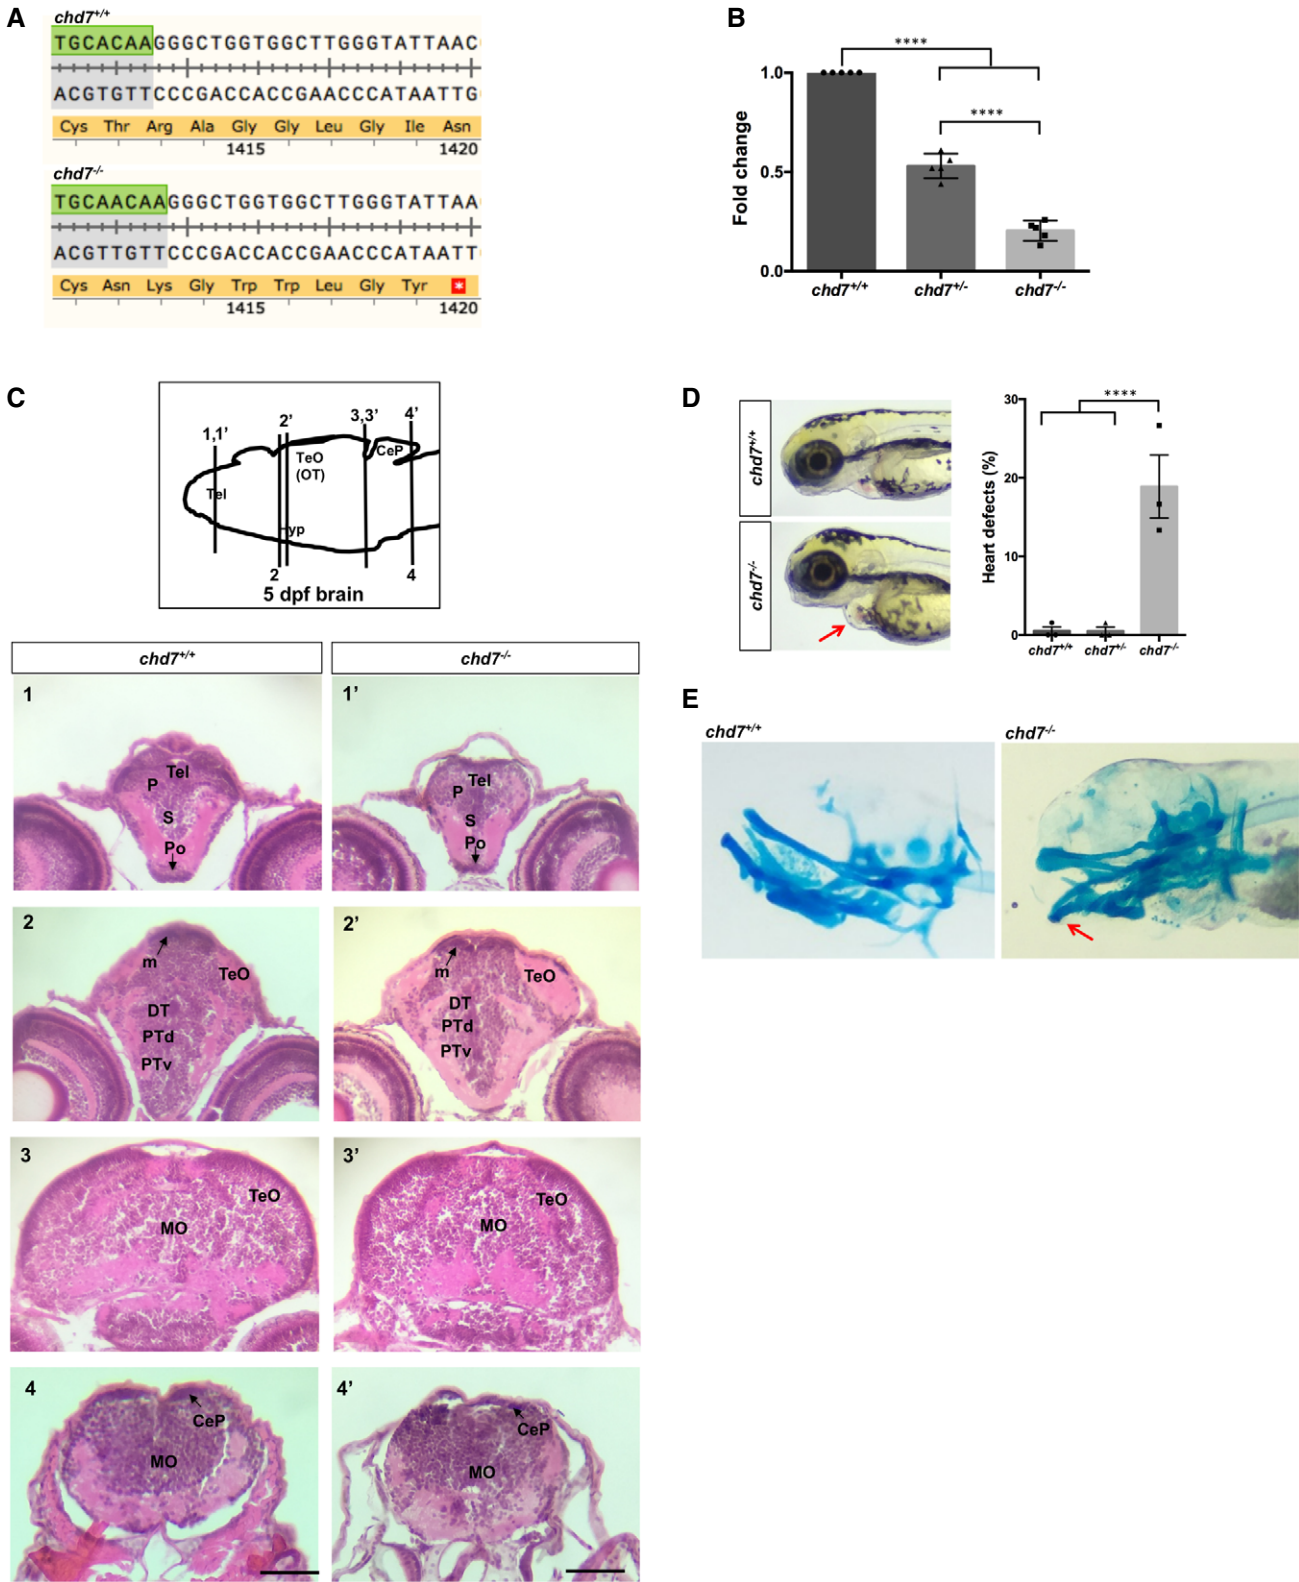

Figure EV1.

**Figure EV2. Proliferation and apoptosis analyses in wild-type and *chd7* mutant zebrafish.**

- A Analysis of GABAergic neurons network development between 1 dpf and 5 dpf between control (top row) and *chd7* mutants (bottom row) ( $N = 3$ ).
- B Proliferation analysis by pH3 staining at 2 dpf in control and *chd7* mutants.
- C Bar graph showing no difference in pH3-positive cells in zebrafish brain at 2 dpf between control and mutants ( $n = 11$ ; ns,  $P = 0.1816$ ; Student's *t*-test).
- D Cell death analysis by TUNEL assay in *chd7*<sup>-/-</sup> and *chd7*<sup>+/+</sup> brains shows no change in apoptotic cells at 2 dpf ( $N = 3$ ,  $n = 8$ ; ns,  $P = 0.464$ ; Student's *t*-test).
- E Transverse sections of 2 dpf larvae after immunostaining with pH3 (red) and NeuroD1 (green). Bar graph showing no difference in pH3 and NeuroD1 double-positive cells (arrows) in zebrafish brain at 2 dpf between control and mutants ( $N = 3$ ,  $n = 5$ ; ns,  $P = 0.124$ ; Student's *t*-test). P: pallium, S: subpallium, TeO: tectum opticum, m: medial tectal proliferating zone, DT: dorsal thalamus R: retina.
- F Proliferation analysis by pH3 staining at 5 dpf in control and *chd7* mutants.
- G An increase in pH3-positive cells was noted in brains of mutant fish compared with controls at 5 dpf ( $N = 4$ ,  $n = 10$ ; \*\*\*\* $P < 0.0001$ ; Student's *t*-test).
- H Transverse sections of 5 dpf larvae after immunostaining with pH3 (red) and HuC/D (green). pH3-positive cells (arrows) were observed at 5 dpf in the medial tectal proliferating zone of mutant fish brains but none in controls ( $N = 3$ ). P: pallium, S: subpallium, TeO: tectum opticum, m: medial tectal proliferating zone, DT: dorsal thalamus.

Data information: Data are presented as mean  $\pm$  SEM. Scale bar = 50  $\mu$ m and 10  $\mu$ m for 2 dpf NeuroD1 and pH3 co-stain.

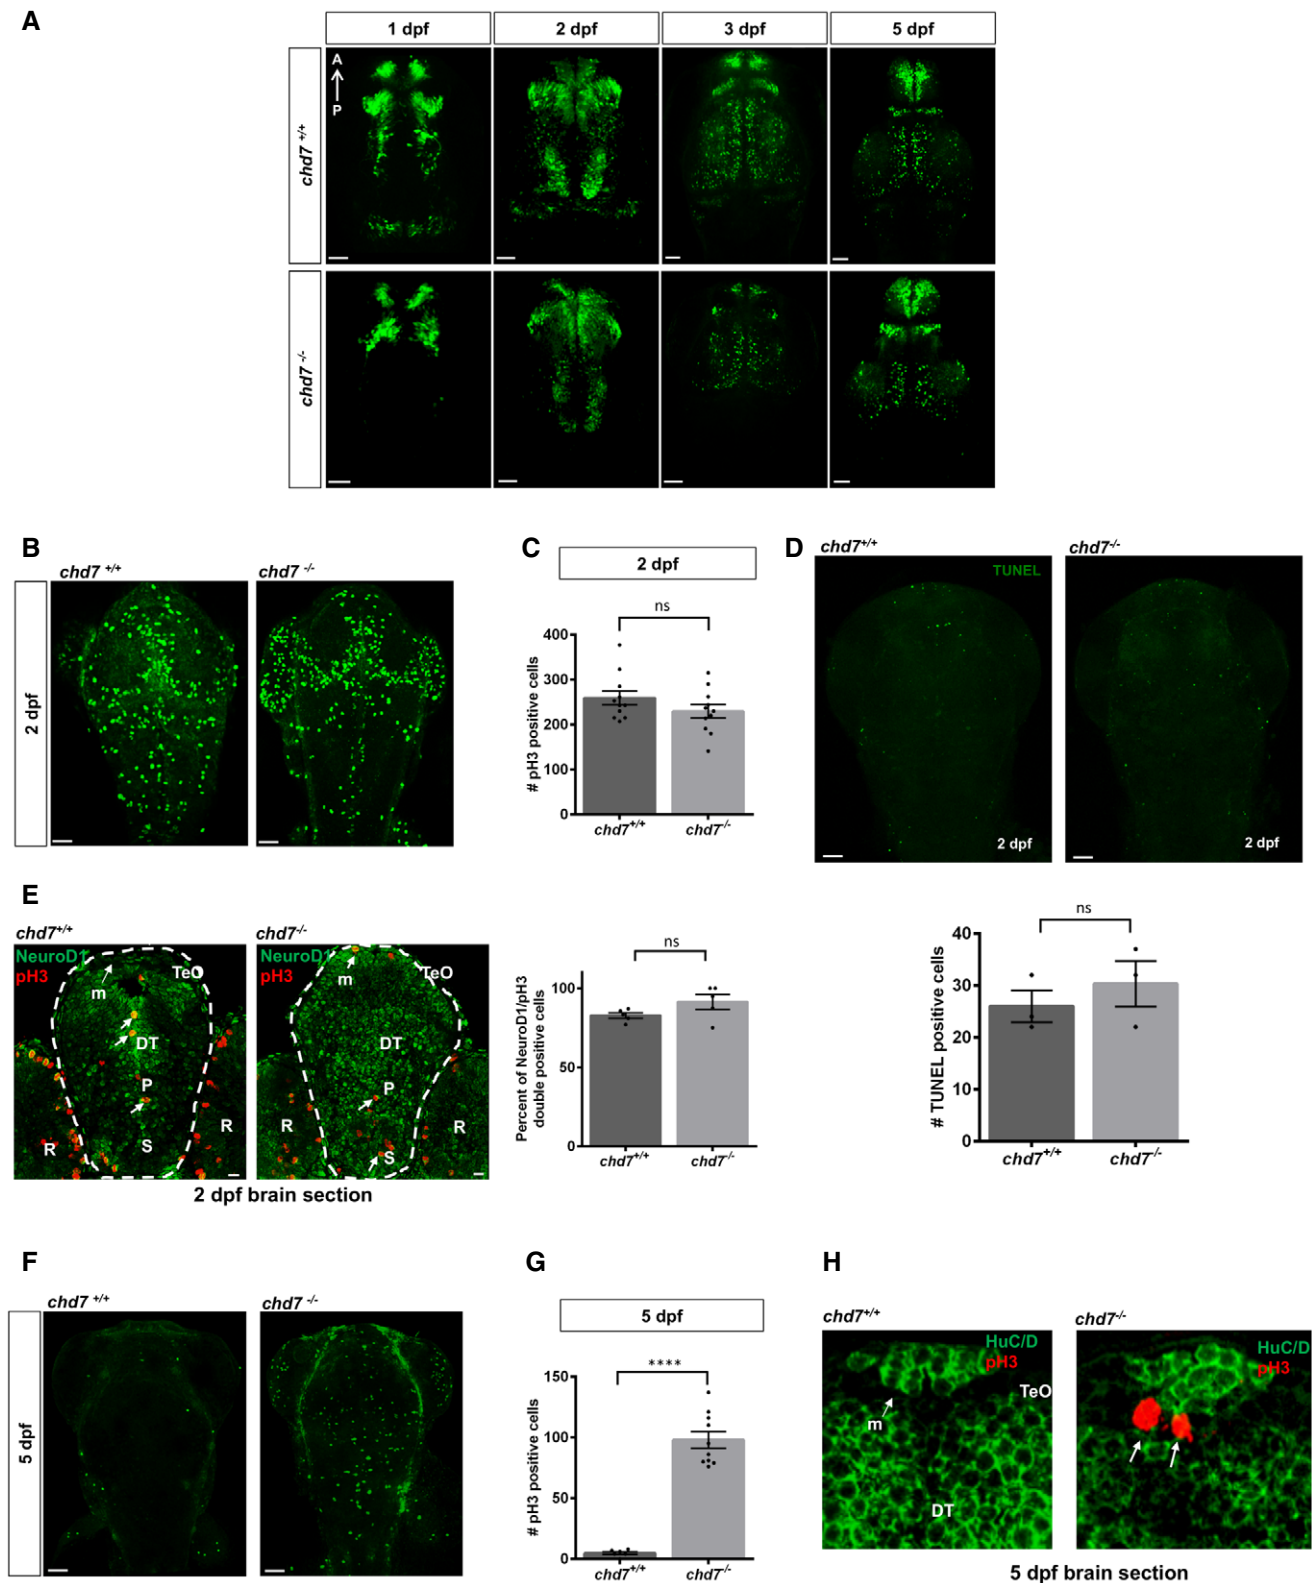

Figure EV2.

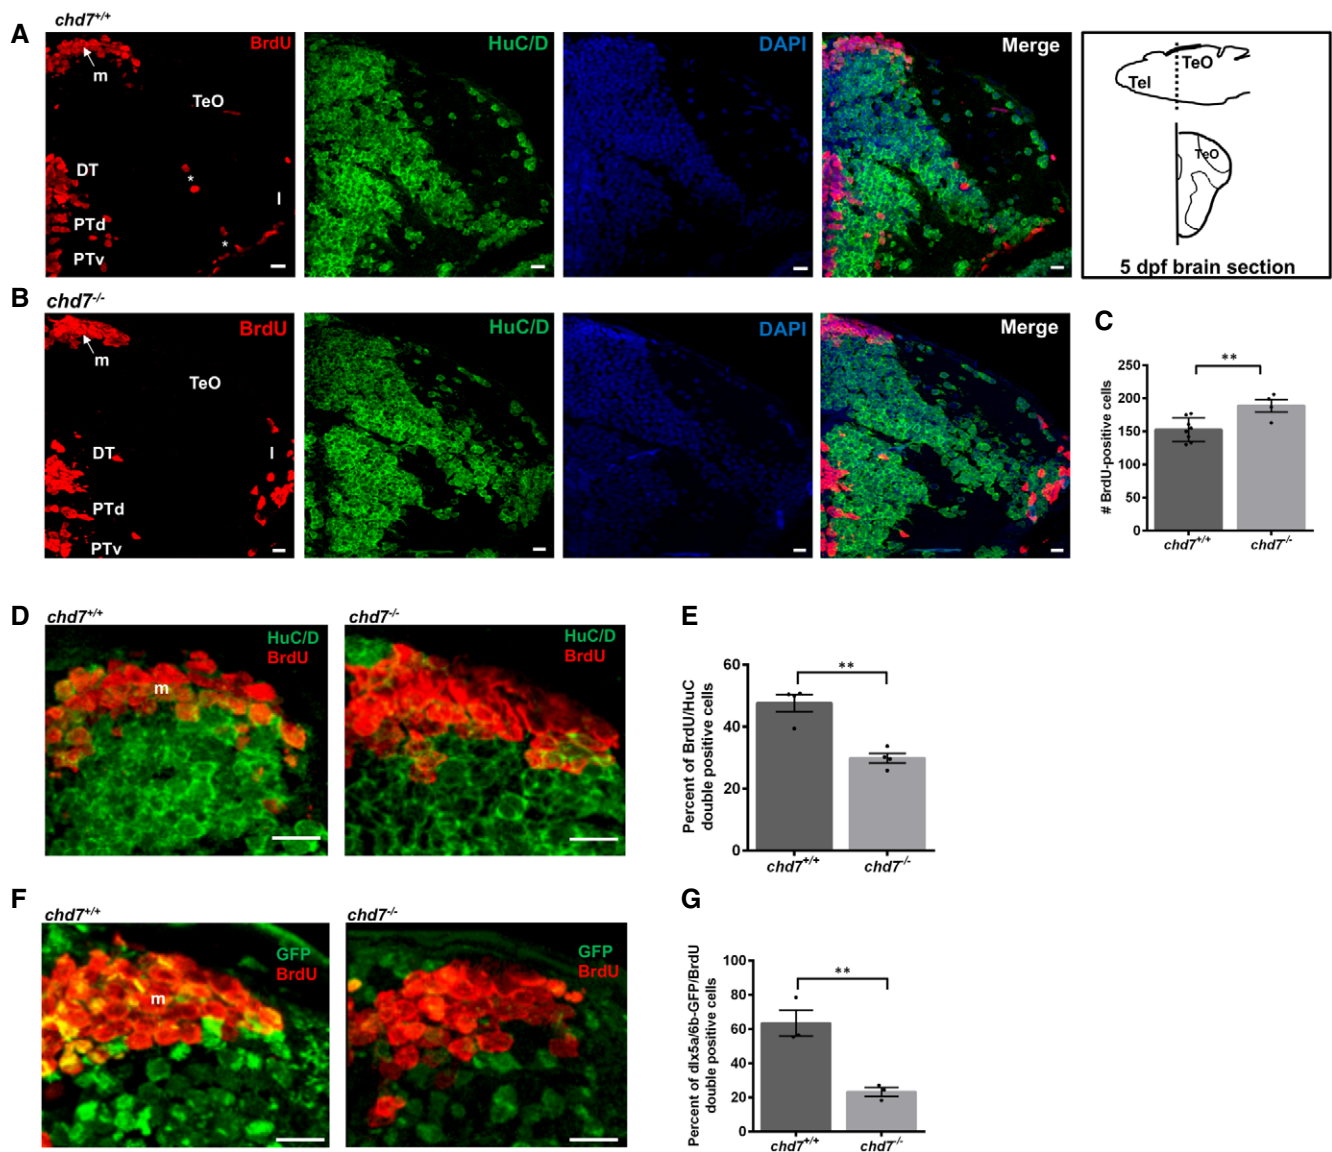

**Figure EV3. Aberrant GABAergic neuronal differentiation in *chd7* mutant zebrafish.**

- A, B Immunostaining with BrdU and HuC/D in brain sections of the zebrafish tectal region in *chd7*<sup>+/+</sup> (A) and *chd7*<sup>-/-</sup> (B). Level of the sections is indicated in the sketch of a 5 dpf zebrafish brain (top right image in (A)). The scale bar is 10  $\mu$ m. Tel: Telencephalon; TeO: tectum opticum, m: medial tectal proliferating zone, DT: dorsal thalamus, PTd: dorsal part of posterior tuberculum, PTv: ventral part of posterior tuberculum, l: lateral tectal proliferation zone. Asterisks (\*) marks early migrated region of pretectum and proglomerular.
- C The number of BrdU-positive cells in transverse sections of the zebrafish brain in *chd7*<sup>+/+</sup> and *chd7*<sup>-/-</sup> ( $N = 3$ , *chd7*<sup>+/+</sup>:  $n = 8$ ; *chd7*<sup>-/-</sup>:  $n = 4$ ;  $**P < 0.05$ ; Student's *t*-test).
- D Immunostaining with BrdU and HuC/D in brain sections of the zebrafish medial tectal region. Scale bar = 10  $\mu$ m. m: medial tectal.
- E The percentage of BrdU and HuC/D-double positive cells among the BrdU-positive cells in the medial tectal zone ( $N = 3$ ,  $n = 4$ ;  $**P < 0.05$ ; Student's *t*-test).
- F Immunostaining with BrdU and GFP (to label *dlx5a/6a-GFP* + GABAergic neurons) in brain sections of the zebrafish medial tectal region. Scale bar = 10  $\mu$ m. m: medial tectal.
- G The percentage of BrdU and *dlx5a/6a-GFP*-double positive cells among the BrdU-positive cells in the medial tectal zone ( $N = 3$ ,  $n = 3$ ;  $**P < 0.05$ ; Student's *t*-test).

Data information: Data are presented as mean  $\pm$  SEM.  $n$  is the number of fish used.  $N$  is the number of experimental repeats.

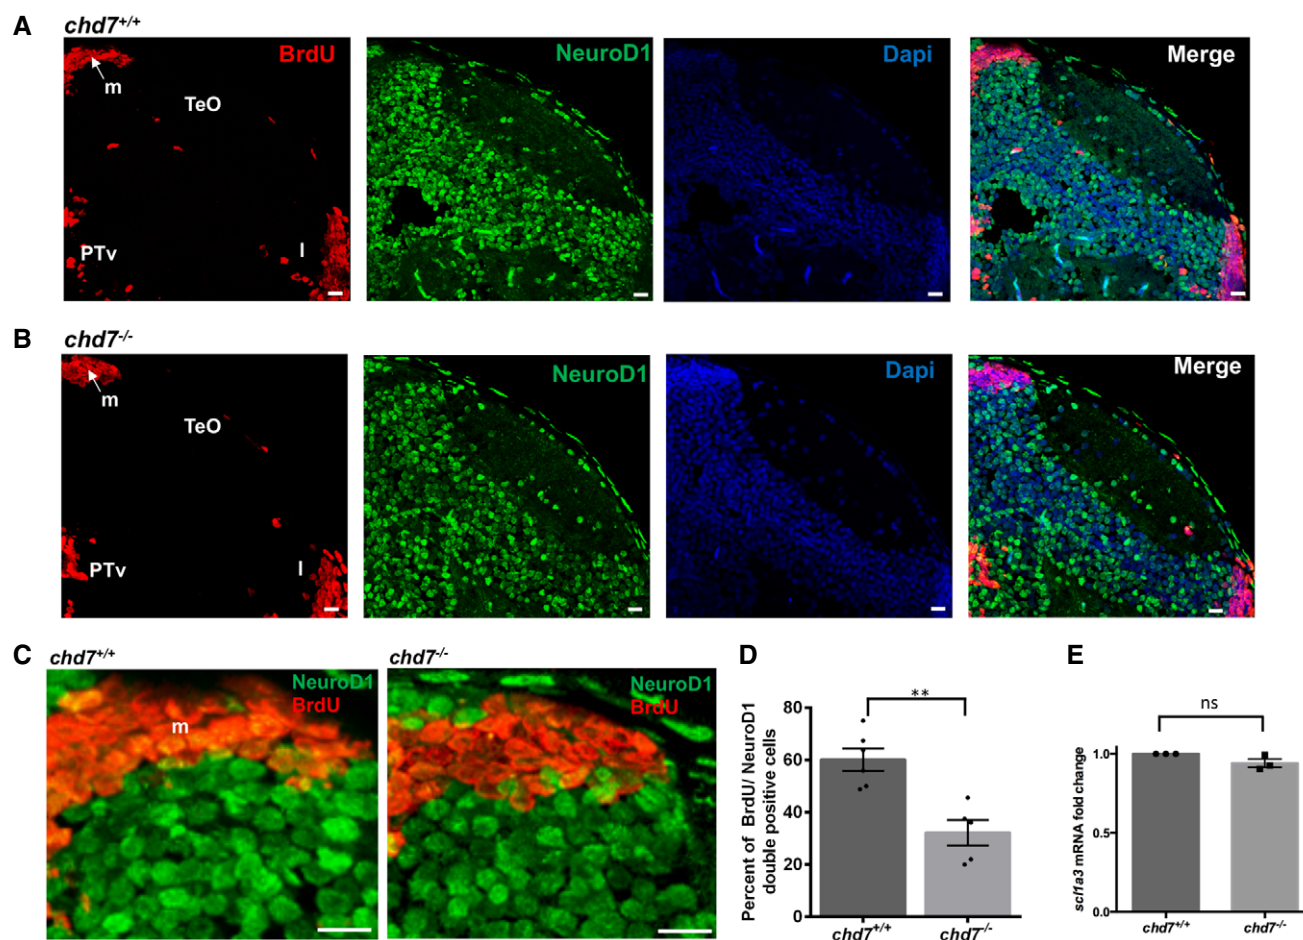

**Figure EV4. Impaired neurogenesis in *chd7* mutant zebrafish.**

A, B Immunostaining with BrdU and NeuroD1 in brain sections of the zebrafish tectal region in *chd7*<sup>+/+</sup> (A) and *chd7*<sup>-/-</sup> (B). The scale bar is 10  $\mu$ m. Tel: Telencephalon; TeO: tectum opticum, m: medial tectal, DT: dorsal thalamus, PTd: dorsal part of posterior tuberculum, PTv: ventral part of posterior tuberculum, l: lateral tectal proliferation zone.

C Immunostaining with BrdU and NeuroD1 in brain sections of the zebrafish medial tectal region. Scale bar = 10  $\mu$ m. m: medial tectal.

D The percentage of BrdU and NeuroD1-double positive cells among BrdU-positive cells in the medial tectal zone ( $N = 3$ , *chd7*<sup>+/+</sup>:  $n = 6$ ; *chd7*<sup>-/-</sup>:  $n = 6$ ;  $**P < 0.05$ ; Student's *t*-test).

E Expression level of *scl1a3* mRNA in *chd7*<sup>-/-</sup> relative to *chd7*<sup>+/+</sup> ( $N = 4$ ). ns, not significant; Student's *t*-test.

Data information: Data are presented as mean  $\pm$  SEM.  $n$  is the number of fish used.  $N$  is the number of experimental repeats.

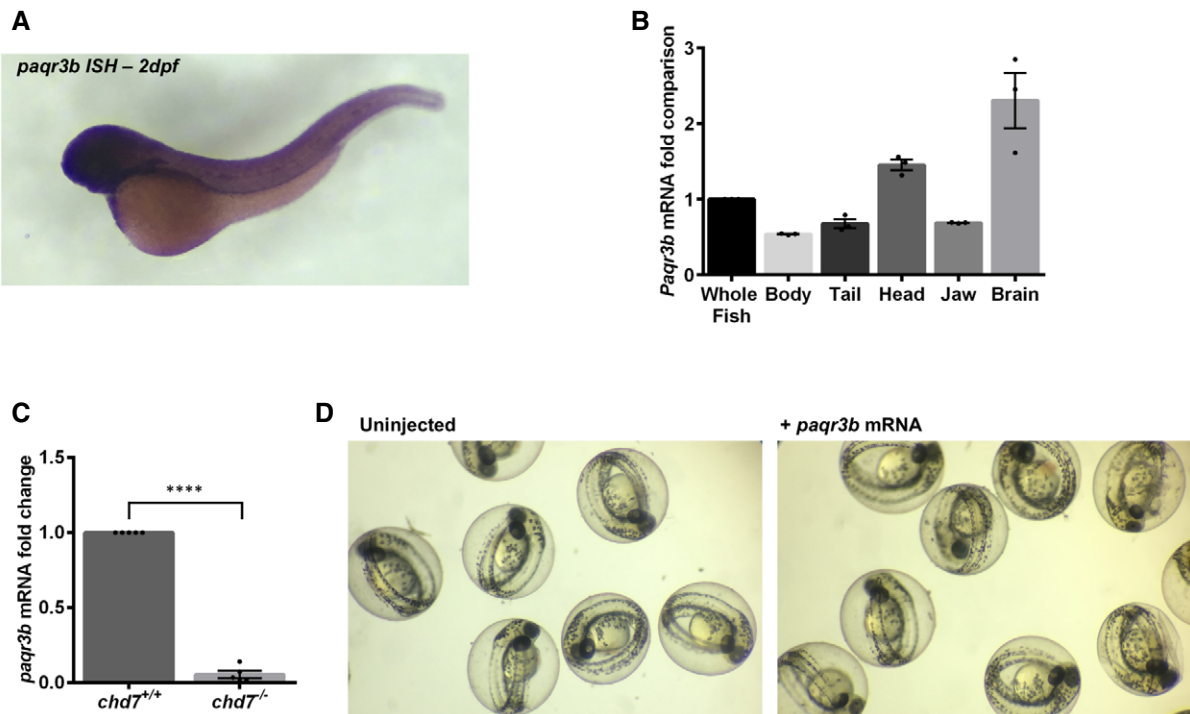

**Figure EV5. Expression of *paqr3b* in wild-type and *chd7* mutant zebrafish.**

A, B Expression profile of *paqr3b* in whole-mount zebrafish by *in situ* hybridization (A) and in tissues by qRT–PCR (B). *N* = 4.

C qRT–PCR validation of the downregulation of *paqr3b* (*N* = 4; \*\*\*\**P* < 0.0001, Student's *t*-test).

D Images of gross morphology of 2 dpf zebrafish embryos with or without overexpression of *paqr3b* mRNA. Of note, neither abnormalities nor death were observed in zebrafish embryos upon overexpression of *paqr3b* mRNA.

Data information: Data are presented as mean ± SEM. *n* is the number of fish used. *N* is the number of experimental repeats.

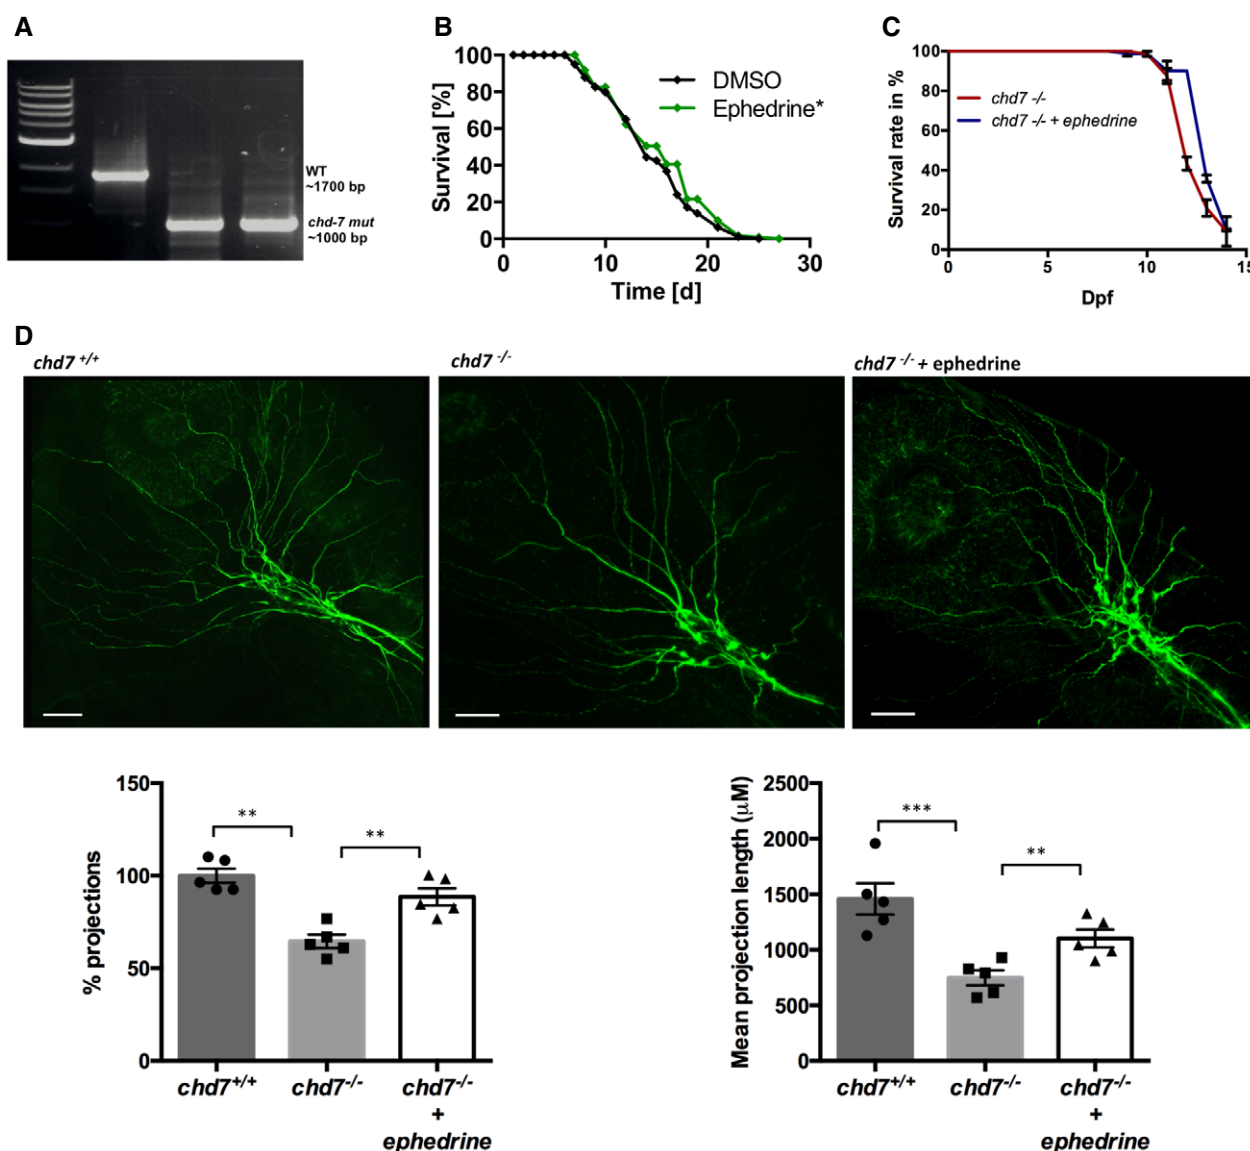

**Figure EV6. Pharmacological responses of *chd7* mutants and amelioration of neuronal network development by ephedrine.**

A PCR proof of a 700 bp deletion in the *chd-7* gene in *chd-7(gk290)* mutant worms.

B Lifespan analyses of *chd-7(gk290)* *Caenorhabditis elegans* mutants treated with ephedrine (green) compared with control DMSO (black). Log-rank test was performed for statistical analyses. ( $N = 3$ ,  $n = 50$ ;  $*P < 0.05$ ).

C Survival rate of *chd7*<sup>-/-</sup> zebrafish mutants treated with ephedrine (blue) compared with untreated mutants (red).  $N = 3$ ,  $n = 60$ .

D Acetylated tubulin staining in non-treated and ephedrine-treated *chd7*<sup>-/-</sup> zebrafish mutants showing rescue of the severely affected outbranching structure of V<sup>th</sup> cranial nerves. Graphs showing quantitative analyses of percentage and mean total length of peripheral projections per zebrafish in controls and mutants without and with ephedrine treatment ( $n = 5$ ;  $***P < 0.001$ ;  $**P < 0.005$ ; one-way ANOVA).

Data information: Data are presented as mean  $\pm$  SEM. Scale bar = 50  $\mu$ m.  $n$  is the number of fish or worms used.  $N$  is the number of experimental repeats.
